# Supplementary material
Source: PubMed Central journal article supplement (PMC3581918)
Supplement: 1217580110_pnas.201217580SI.pdf [file 1217580110_pnas.201217580SI.pdf]

# Supporting Information

Loebbermann et al. 10.1073/pnas.1217580110

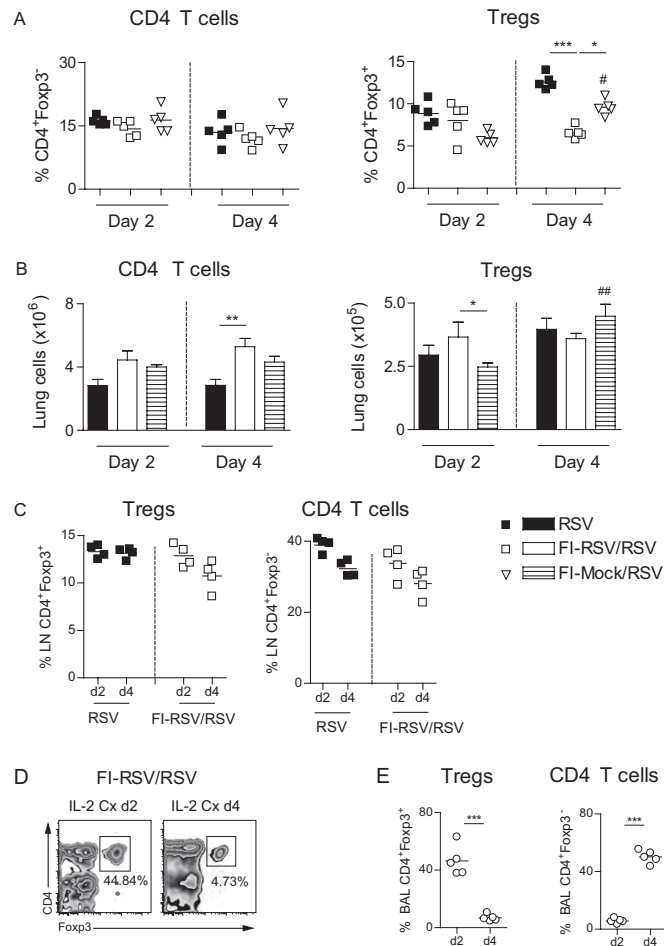

**Fig. S1.** Formaldehyde-inactivated respiratory syncytial virus (FI-RSV) vaccination leads to a reduction of regulatory T cells (Tregs) in the lung but not in the draining lymph node (LN) after RSV infection. FI-RSV- or mock-infected Hep-2 cell material (FI-Mock)-vaccinated mice were infected with RSV on day 0. Lungs were harvested on days 2 and 4 postinfection. (A) Quantification of frequencies of Tregs and forkhead box p3 (Foxp3)<sup>+</sup> gated CD3<sup>+</sup>CD4<sup>+</sup> T cells (CD4 T cells) in the lung on days 2 and 4 after RSV infection. (B) Total cell numbers of Tregs and CD4 T cells in the lung on days 2 and 4 after RSV infection. (C) Frequencies of Tregs and CD4<sup>+</sup> T cells in the mediastinal LNs on days 2 and 4 after RSV infection. (D) Frequencies of CD3<sup>+</sup>CD4<sup>+</sup> gated Tregs in bronchoalveolar lavage (BAL) of FI-RSV-vaccinated, immune complexes of IL-2/anti-IL-2 (IL-2 Cx)-injected mice on days 2 and 4 after RSV infection. (E) Quantification of frequencies of Tregs and CD4 T cells on days 2 and 4 after RSV infection in FI-RSV-vaccinated, IL-2 Cx-injected mice. One representative study of two independent experiments with five mice per group is shown. Results are presented as means  $\pm$  SEM. The significance of results between the groups was analyzed by two-tailed, unpaired Student *t* test. \**P* < 0.05, \*\**P* < 0.01, \*\*\**P* < 0.001 was used to compare different groups on one day point and #*P* < 0.05, ##*P* < 0.01, ###*P* < 0.001 was used for comparing one group at different day points. \**P* < 0.05, \*\**P* < 0.01, \*\*\**P* < 0.001.



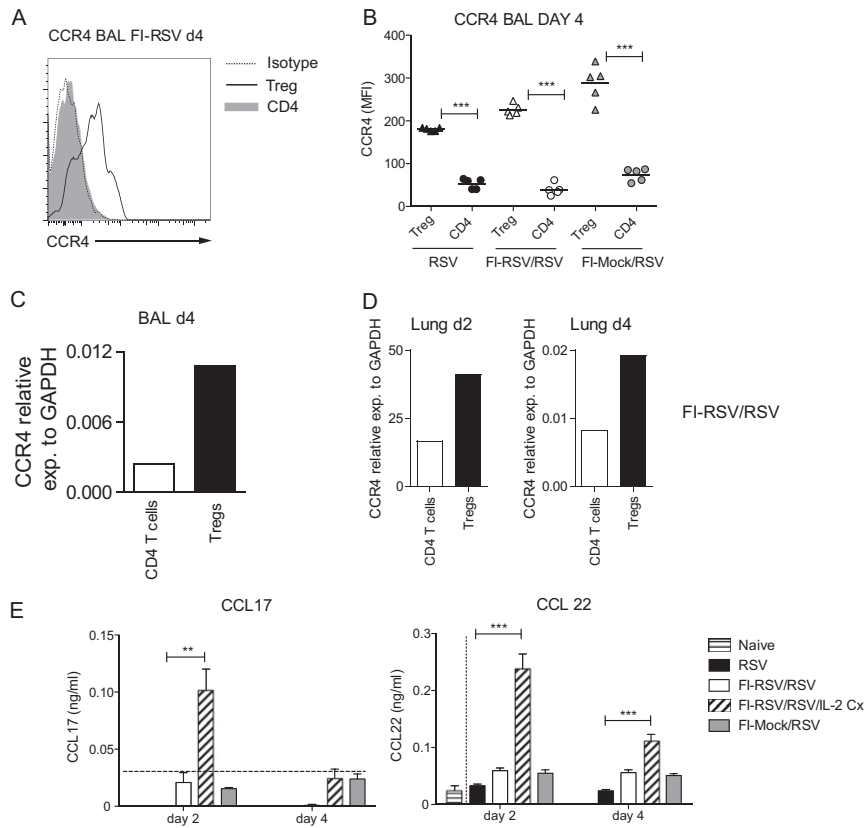

**Fig. S3.** Tregs in the lung express CCR4. FI-Mock- or FI-RSV-vaccinated mice were infected with RSV on day 0, and lymphocytes recovered by BAL on day 4. When indicated, mice were injected with IL-2 Cx on days -3, -2, and -1. (A) Expression of CCR4 on Tregs and CD4 T cells in the BAL measured by flow cytometry on day 4 postinfection. (B) Quantification of CCR4 expression on Tregs and CD4 T cells in the BAL on days 2 and 4 postinfection measured as mean fluorescent intensity (MFI). (C) Relative expression of CCR4 to GAPDH of BAL CD4 T cells and Tregs on day 4 postinfection determined by real-time PCR of FI-RSV-vaccinated and RSV-infected mice. PCR was performed on pooled FACS-sorted cells. (D) Relative expression of CCR4 to GAPDH of CD4 T cells and Tregs in the lung on days 2 and day 4 postinfection determined by real-time PCR of pooled FACS-sorted cells. (E) Levels of chemokines CCL17 and CCL22 in the BAL of FI-RSV vaccinated mice measured by ELISA on days 2 and 4 after RSV infection. Data are pooled from two independent experiments, four to five mice per group in each graph. Results are presented as means  $\pm$  SEM. The significance of results between the groups was analyzed by two-tailed, unpaired Student *t* test. \**P* < 0.05, \*\**P* < 0.01, \*\*\**P* < 0.001.

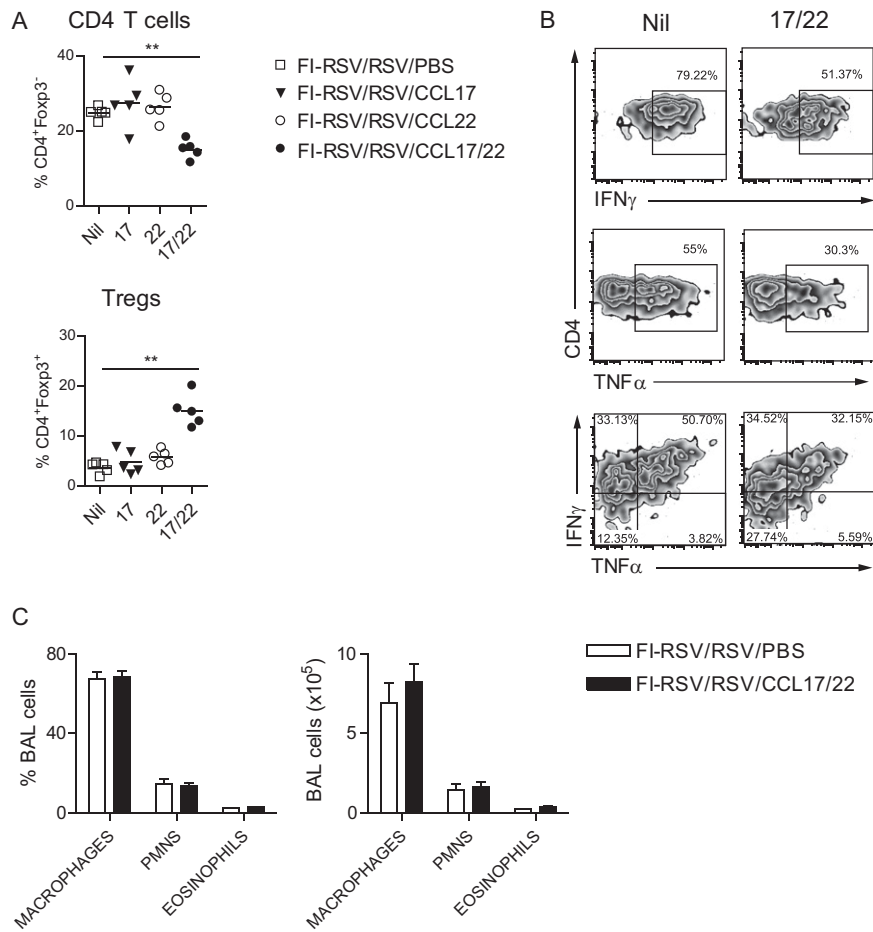

**Fig. 54.** Effects of instillation of CCL17 and/or CCL22 in the airways of FI-RSV-vaccinated mice after RSV infection. (A) Quantification of frequencies of Tregs and CD4 T cells on days 2 and 4 after RSV infection in FI-RSV-vaccinated and either CCL17- or CCL22-treated mice. (B) Frequencies of CD4<sup>+</sup>IFN- $\gamma$ <sup>+</sup> T cells, CD4<sup>+</sup>TNF- $\alpha$ <sup>+</sup> T cells, and CD4<sup>+</sup>TNF- $\alpha$ <sup>+</sup>IFN- $\gamma$ <sup>+</sup> T cells in the BAL on day 4 after RSV infection were quantified using flow cytometry on days 2 and 4 after RSV infection. (C) Frequencies (Right) and total numbers (Left) of macrophages, neutrophils (PMNS), and eosinophils in the BAL were quantified using differential cell counting of H&E-stained cytopins slides on day 4 postinfection. Graphs show data from one representative out of two independent experiments with five mice per group in each case. Results are presented as means  $\pm$  SEM. The significance of results between the groups was analyzed by two-tailed, unpaired Student *t* test. \**P* < 0.05, \*\**P* < 0.01, \*\*\**P* < 0.001.

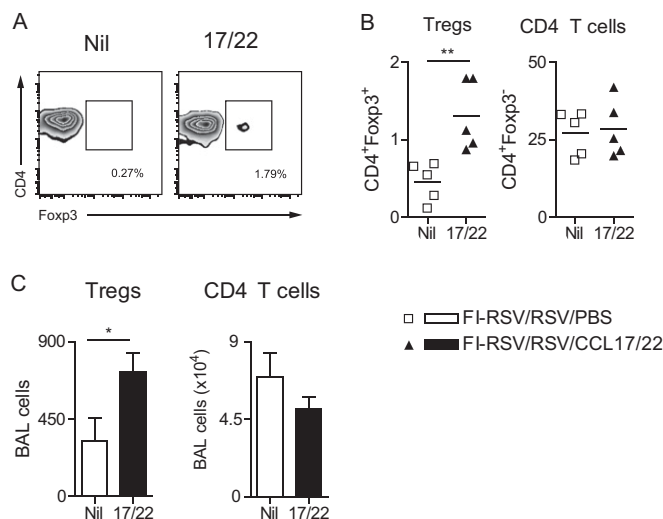

**Fig. 55.** Late effects of chemoattraction of Tregs into the airways by CCL17/22. BALB/c mice were vaccinated with FI-RSV and infected 3 wk later with RSV intranasally (i.n.) (day 0). When indicated, mice were treated i.n. with a mixture of 0.5 µg of both CCL17 and 22, or PBS on day 2 after RSV infection. (A) Frequencies of Tregs in the BAL were quantified using flow cytometry on day 8 after RSV infection with (17/22) or without (nil) i.n. administration of CCL17/22. (B) Quantification of Tregs and CD4 T-cell frequencies in the BAL on day 8 after RSV infection. (C) Quantification of total numbers of Tregs and CD4 T cells in the BAL on day 8 after RSV infection. Graphs show data from one representative out of two independent experiments with five mice per group in each case. Results are presented as means  $\pm$  SEM. The significance of results between the groups was analyzed by two-tailed, unpaired Student *t* test. \**P* < 0.05, \*\**P* < 0.01, \*\*\**P* < 0.001.

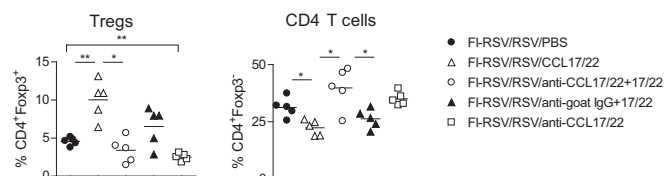

**Fig. 56.** Anti-CCL17/22 treatment decreases Treg frequencies. Mice were injected i.p. with anti-CCL17 and 22 antibodies or goat IgG control on day 1 after RSV infection into FI-RSV-vaccinated mice before instillation of CCL17/22 on day 2 postinfection. Quantification of Tregs (*Left*) and CD4 T-cell (*Right*) frequencies in the BAL on day 4 after RSV infection. Graphs show data from one representative out of two independent experiments with five mice per group in each case. Results are presented as means  $\pm$  SEM. The significance of results between the groups was analyzed by two-tailed, unpaired Student *t* test. \**P* < 0.05, \*\**P* < 0.01, \*\*\**P* < 0.001.

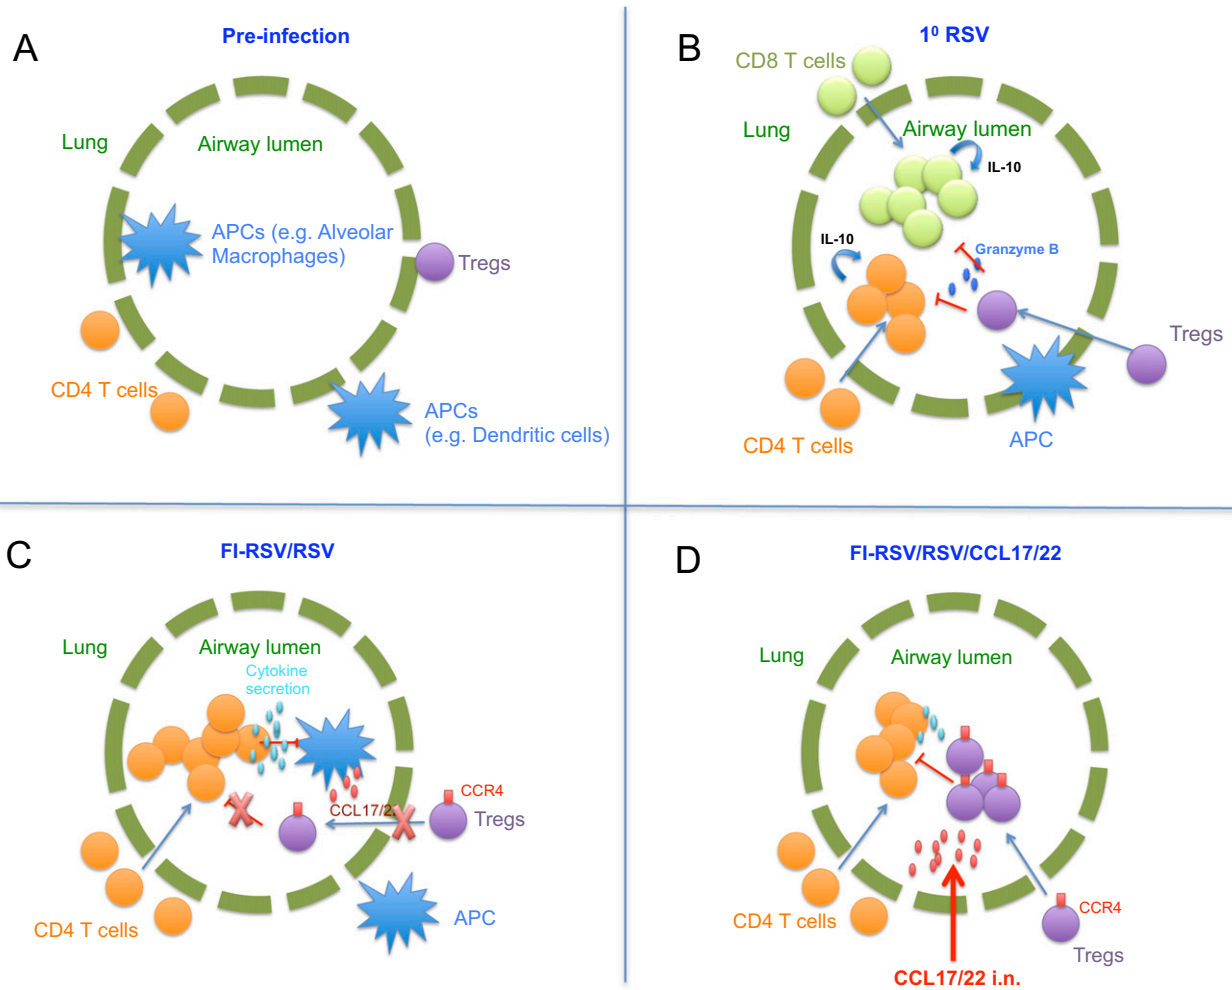

**Fig. S7.** The balance of regulatory and disease-causing T cells in RSV infection. (A) The airways of naive mice contain alveolar macrophages but no other immune cells. (B) In RSV primary infection, macrophages become activated and CD4 and CD8 T cells migrate into the lung and airways. These are kept in check by Tregs, which require granzyme B to function (1); both CD4 and CD8 T cells produce IL-10, which assists in modulation of the immune response (2). (C) RSV infection of mice previously vaccinated with FI-RSV shows a rapid and exuberant CD4 T-cell response, leading to mediator release into the local environment and shutdown of the production of CCL17/22 by resident cells. These chemokines normally recruit Tregs into the airways, so a decline in chemoattraction of Treg enhances disease. (D) Administration of CCL17/22 intranasally bypasses the shutdown of Treg recruitment and attenuates vaccine-augmented disease, reducing disease severity. APC, Antigen presenting cell.

1. Loebbermann J, et al. (2012) Regulatory T cells expressing granzyme B play a critical role in controlling lung inflammation during acute viral infection. *Mucosal Immunol* 5(2):161-172.
2. Loebbermann J, et al. (2012) IL-10 regulates viral lung immunopathology during acute respiratory syncytial virus infection in mice. *PLoS ONE* 7(2):e32371.
